# Supplementary material for: Evaluation of Reablement Home Care: Effects on Care Attendants, Care Recipients, and Family Caregivers
Source: MDPI journal article supplement (doi:10.3390/ijerph17238784), 2020-11-26
Supplement: s1 [file s1]

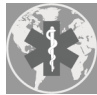

**Supplement Table S1.** The content of the reablement home care model for empowering the care attendants

| Topics                                  | Contents                                                                                                                                                                                                |
|-----------------------------------------|---------------------------------------------------------------------------------------------------------------------------------------------------------------------------------------------------------|
| Concept of reablement and self-reliance | Experiencing the difficulty of disability, concept of reablement, comparison of traditional care and self-reliance home care, care knowledge basis                                                      |
| Personal hygiene skills                 | Bathing/showering, dressing and changing clothes, using toilet and cleansing,                                                                                                                           |
| Transferring and mobility skills        | Skills in turning over, care for sitting up, balance of sitting, care for standing up, balance of standing, care for walking, care for climbing stairs, transferring (bed-chair-wheelchair)             |
| Use of assistive devices                | personal care assistive device, transferring and mobility assistive devices, personal care and protective assistive devices, fall preventing assistive devices, resource connection of assistive device |
| Home environment assessment             | home care setting assessment and modification for barrier-free environment,                                                                                                                             |
| Home rehabilitation activities          | Knowledge of rehabilitation, joint activities, limb recession prevention, rehabilitative activities for long-term bedded users, activity design                                                         |
| Individualized home care plan           | Physical function in activities of daily living and instrumental activities of daily living, scale assessment skills and goal setting, communication skills, use of sympathy                            |

**Supplement Table S2.** The self-reliance home care scale

| <b>Dependence in home care</b>                                                                                                                       |
|------------------------------------------------------------------------------------------------------------------------------------------------------|
| 1. The longer hours of home care services, the more help I get.                                                                                      |
| 2. The more items of home care I use, the more assistance I get.                                                                                     |
| 3. The goal of home care is to get the daily activities (such as taking a bath, housework) that I can't do done for me.                              |
| 4. Home care can replace all the self-care function.                                                                                                 |
| 5. When the family caregiver provides care, they usually don't know the caring skills and depend on home care attendants.                            |
| 6. I can feel the caregiving pressure perceived by the family caregivers.                                                                            |
| 7. The home care service from the agency meets my needs.                                                                                             |
| <b>Mutual-support in home care</b>                                                                                                                   |
| 8. The home care attendant usually discuss the service content or method of care with me.                                                            |
| 9. The home care attendant provide some methods to help me realize the self-care skills.                                                             |
| 10. I am willing to let care attendants teaching me how to accomplish self-care (such as taking a bath, walking, etc.)                               |
| 11. Home care can reduce my family caregivers reducing their burden.                                                                                 |
| 12. I am willing to spend time learning how to do daily activities independently.                                                                    |
| 13. I am willing to set up some goal to improve self-care ability.                                                                                   |
| 14. I need assistive device (such as wheels or walker) to help me do my daily activities by myself.                                                  |
| 15. I expect the home care attendants share the caregiving stress with family caregivers. #                                                          |
| 16. I try my best to accomplish the daily activities by myself.                                                                                      |
| 17 The home care attendants is competent in providing care to me.                                                                                    |
| <b>Independence in home care</b>                                                                                                                     |
| 18. A good care is to help me become able to do self-care independently.                                                                             |
| 19. I am willing to modify my home setting to increase my ability in daily activities                                                                |
| 20. I believe that I still have some ability to accomplish self-care.                                                                                |
| 21. I expect to learn self-care to reduce family caregiver's burden.                                                                                 |
| 22. Family can obtain the caregiving skills and knowledge from home care services.                                                                   |
| 23. I have autonomy in deciding the care of my daily activities (such as the way to taking a shower).                                                |
| 24. When I can learn self-care and keep better, I can stay at home longer (from using institutional care).                                           |
| 25. Home care services help me live in my home comfortably and thus I don't need to worry that I have to go to a long-term care institution someday. |
| 26. I feel the sense of accomplishment when I learn how to do self-care.                                                                             |
| 27. When I learn self-care, my family can help me in a more efficient way.                                                                           |
| 28. believe that home care is better than other ways of long-term care (e.g. day care or institutional care)                                         |
